1 **Validation of multiplex steroid hormone measurements in prostate cancer using**  
2 **plasma for multimodality biomarker studies**

3 Gido Snaterse<sup>1,a</sup>, Lianne F van Dessel<sup>2,a</sup>, Angela E Taylor<sup>3</sup>, Jenny A Visser<sup>1</sup>, Wiebke Arlt<sup>3</sup>, Martijn P  
4 Lolkema<sup>2</sup>, Johannes Hofland<sup>1,\*</sup>

5 1. Department of Internal Medicine, Section of Endocrinology, Erasmus MC, Rotterdam, The  
6 Netherlands

7 2. Department of Medical Oncology, Erasmus MC Cancer Institute, Erasmus MC, Rotterdam, The  
8 Netherlands

9 3. Institute of Metabolism and System Research, University of Birmingham, Birmingham, United  
10 Kingdom

11 <sup>a</sup>These authors contributed equally to this work.

12 \*Corresponding author

13 Address for correspondence: Johannes Hofland, Department of Internal Medicine, Erasmus MC, Rg5, Dr.  
14 Molewaterplein 40, 3015 GD, Rotterdam, The Netherlands. Tel.: +31 10 704 0446.

15 E-mail: [j.hofland@erasmusmc.nl](mailto:j.hofland@erasmusmc.nl)

16

17 **Running title:** Multiplex steroid measurements in prostate cancer

18 **Key words:** Steroids, Androgens, Testosterone, CellSave, LC-MS/MS

19



21 **General Abbreviations**

|    |          |                                                     |
|----|----------|-----------------------------------------------------|
| 22 | ANOVA    | Analysis of variance                                |
| 23 | CRPC     | Castration resistant prostate cancer                |
| 24 | CS       | CellSave Preservative tube                          |
| 25 | CTC      | Circulating tumour cell                             |
| 26 | ctDNA    | circulating tumour DNA                              |
| 27 | HC       | Healthy Control                                     |
| 28 | LC-MS/MS | Liquid chromatography tandem mass spectrometry      |
| 29 | LOQ      | Limits of quantification                            |
| 30 | MS       | Mass spectrometry                                   |
| 31 | MSP      | Mechanically separated plasma tube                  |
| 32 | MTBE     | Methyl-tert butyl ether                             |
| 33 | PC       | Prostate cancer                                     |
| 34 | S/N      | Signal-to-noise                                     |
| 35 | PBS-BSA  | phosphate-buffered saline with bovine serum albumin |

36 **Steroid abbreviations**

|    |       |                        |
|----|-------|------------------------|
| 37 | 17OHP | 17-hydroxyprogesterone |
| 38 | A4    | Androstenedione        |
| 39 | B     | Corticosterone         |
| 40 | DHEA  | Dehydroepiandrosterone |
| 41 | DHT   | Dihydrotestosterone    |
| 42 | E     | Cortisone              |
| 43 | F     | Cortisol               |
| 44 | T     | Testosterone           |

45 **ABSTRACT**

46 **Background**

47 Steroid hormones are essential signaling molecules in prostate cancer (PC). However, many studies  
48 focusing on liquid biomarkers fail to take hormonal status of these patients into account. Because  
49 steroid measurements are sensitive to bias caused by matrix effects, thus assessing potential matrix  
50 effects is an important step in combining ctDNA analysis with hormone status.

51 **Methods**

52 We investigated the accuracy of multi-steroid hormone profiling in mechanically-separated plasma  
53 tubes (MSP) and in CellSave Preservative plasma tubes (CS), that are typically used to obtain ctDNA. We  
54 performed multiplex steroid profiling in samples obtained from ten healthy controls and ten castration-  
55 resistant prostate cancer patients

56 **Results**

57 Steroid measurements were comparable between the MSP and serum tubes. A small but consistent  
58 decrease of 11 – 18% compared to serum was observed in CS tubes, which was considered to be within  
59 the acceptable margin. The minimally residual testosterone levels of castrate patients could be  
60 sensitively quantified in both CS and MSP samples.

61 **Conclusions**

62 We validated the use of MSP and CS tubes for multi-steroid profiling by LC-MS/MS. The optimised use of  
63 these samples used in clinical trials will allow us to gain further insight into the steroid metabolism in PC  
64 patients.

65 **INTRODUCTION**

66 Prostate cancer is a steroid-hormone dependent disease where androgens play a pivotal role in the  
67 evolution of the disease. Targeting the androgen signaling pathway through androgen deprivation  
68 therapy (ADT) in locally advanced and metastatic prostate cancer is a highly effective way to inhibit  
69 tumour growth<sup>1</sup>. However, tumour cells will eventually become resistant to these low androgen  
70 concentrations and show disease progression. Resistance mechanisms include androgen receptor (AR)  
71 modifications, like mutations and overexpression<sup>2,3</sup>, and changes in androgen biosynthesis and  
72 metabolism, thereby increasing intratumoural androgen availability<sup>4-6</sup>. The continued importance of the  
73 androgen signaling pathway in castration-resistant prostate cancer (CRPC) is underlined by the survival  
74 benefits observed with second-line therapies such as the anti-androgen enzalutamide and adrenal  
75 steroidogenesis inhibitor abiraterone<sup>7-10</sup>. Circulating steroid levels are measured to verify efficacy of  
76 hormonal treatment and have a prognostic value in patients with prostate cancer<sup>11-13</sup>.

77 The assessment of circulating steroid hormones relies heavily on sensitive, specific and accurate  
78 measurement techniques, especially at castrate levels. Liquid-chromatography tandem mass  
79 spectrometry (LC-MS/MS) combines multi-steroid profiling capabilities with superior sensitivity and  
80 specificity<sup>14,15</sup> over older techniques<sup>16,17</sup>, while maintaining high sample throughput<sup>18,19</sup>. Extensive MS-  
81 based steroid panels have been successfully developed in recent years to improve the detection and  
82 diagnosis of disorders associated with abnormal steroid hormones concentrations<sup>20-23</sup>.

83 Steroid measurements are predominantly performed in serum samples. Previous LC-MS/MS studies  
84 have shown that steroids can be quantified reliably across different blood matrices<sup>24-26</sup>, but there are  
85 differences observed between plasma and serum, glass and plastic tubes, or when using tubes with  
86 different stabilizing agents or with gel-separators<sup>24-29</sup>. Consequently, alternative collection tubes and  
87 extraction methods must be validated before they can reliably be used for steroid profiling.

88 The use of CellSave (CS) tubes in population- and patient-based cohorts has grown as this specialised  
89 'cell-stabilizing' blood collection tube preserves both circulating tumour cells (CTCs) and cell-free  
90 circulating tumour DNA (ctDNA)<sup>30,31</sup>. These biomarkers allow for the assessment of tumour cell genomic  
91 characteristics such as genomic instability in these patients<sup>32</sup>. These samples are now extensively  
92 collected in (cancer) biobanks and could potentially also be used to measure patient steroid profiles.

93 Mechanical separation methods of blood are similarly gaining popularity in clinical chemistry due to  
94 their easy applicability compared to those that use a separation gel. The BD Vacutainer Barricor is a  
95 mechanically-separated plasma (MSP) tube, and it has shown no obvious bias in steroid hormone  
96 measurements versus a gel-based plasma tube in a single study<sup>33</sup>, but this was confined to a select  
97 number of five steroids, warranting further investigation.

98 Previous studies have identified matrix effects, interference caused by a contaminant from serum or  
99 collection tube that leads to false high or low quantification, as a potential source of bias<sup>25,26,28</sup>, and it is  
100 therefore imperative to assess the quality of steroid measurements in CS tubes and MSP tubes. In this  
101 study, we aimed to determine if plasma obtained with these tubes is suitable for multiplex steroid  
102 profiling. To this end, we performed LC-MS/MS analysis on serum obtained with standard SST™ II  
103 Advance Vacutainer® tubes and plasma samples obtained with MSP and CS tubes from healthy control  
104 (HC) subjects and patients with CRPC.

## 105 RESULTS

### 106 Comparison of blood collection tubes

107 Baseline characteristics of the study participants are shown in **Table 1**. Circulating steroid levels of 16  
108 steroids were determined by LC-MS/MS in 10 HCs and 10 mCRPC patients in all three collection tubes.  
109 Quantification and concentration ranges for the steroids are reported in **Table 2**. Most steroids could be  
110 quantified in healthy controls at the level of the lowest calibration sample (0.25 ng/ml), with the  
111 exception of androstenedione (0.5 ng/ml), DHEA (1 ng/ml) and DHT (1 ng/ml). Serum DHEA values  
112 below the LLOQ were detected (HC: n =1, CRPC: n = 4) and excluded from further analysis.

113 The values observed in MSP samples were comparable to those found in serum for most steroids. The  
114 only exception was DHEA, which was higher ( $21.3 \% \pm 32.9 \% p < 0.05$ ) in the MSP samples than in serum  
115 (**Figure 1**). In CS samples, significantly lower concentrations compared to serum were observed for  
116 corticosterone ( $-16.2 \% \pm 15.2 \% , p < 0.01$ ), 17-hydroxyprogesterone ( $-11.0 \% \pm 20.03 \% , p < 0.05$ ), cortisol  
117 ( $-13.2 \% \pm 13.0 \% , p < 0.001$ ), cortisone ( $-14.4 \% \pm 13.1 \% , p < 0.001$ ), androstenedione ( $-18.4 \% \pm 13.6 \% ,$   
118  $p < 0.01$ ). No significant differences were found for DHEA compared to serum.

119 Similar steroid concentrations between HC and mCRPC subjects were observed for corticosterone,  
120 cortisol and cortisone (**Figure 2**). Lower concentrations were observed for 17-hydroxyprogesterone,  
121 androstenedione and testosterone in mCRPC subjects. This was likely due to a combination of castration  
122 (testosterone) and age-related effects, as the mCRPC subjects were older than those the healthy control  
123 subjects.

124 Androgen levels in mCRPC patients are >10 fold lower than in healthy men due to ADT, requiring  
125 sensitive techniques to accurately measure residual androgens. The calibration series was expanded to  
126 include lower concentrations (0.01 – 0.25 ng/ml) to allow quantification of castrate testosterone levels.

127 Accurate quantification at 0.01 ng/mL was achieved for testosterone. Similar to the other steroids, lower  
128 testosterone concentrations compared to serum were detected in CS samples, but not in MSP samples,  
129 at normal HC concentrations ( $-11.5\% \pm 2.8\%$ ,  $p < 0.001$ ) and at castrate concentrations ( $-16.9\% \pm 24.2\%$ ,  
130  $p < 0.05$ ) (**Figure 1**). Low signal-to-noise ratios limited the reliability of DHT quantification which could not  
131 be accurately quantified in the CRPC subjects with our assay.

### 132 **Correlation of steroid measurements between matrices**

133 The correlations between results obtained MSP and CS samples, respectively, compared to those  
134 obtained in serum were determined by linear regression (**Figure 3**). For the DHT analysis only HC  
135 samples were included. Corticosterone, DHEA and testosterone were normally distributed after log-  
136 transformation. Significant correlation ( $p < 0.001$ ) between both matrices and serum was observed for  
137 corticosterone, 17-hydroxyprogesterone, cortisol, DHEA and testosterone. High correlation was also  
138 observed for cortisone and androstenedione, but with a more than 20% deviation from the optimal  
139 slope ( $p < 0.05$ ) with the CS matrix: both 0.79x. The analysis also revealed a poor correlation for DHT  
140 between CS and serum ( $R^2 = 0.60$ ) and between MSP and serum ( $R^2 = 0.45$ ).

141



## 142 DISCUSSION

143 In this study, we investigated whether collected samples that are abundantly present in biobanks  
144 obtained from PC patients such as mechanically separated plasma or CS-derived plasma are suitable for  
145 multiplex steroid profiling by LC-MS/MS. We compared them to the current standard collection method  
146 using SST™ II Advance Vacutainers. We showed that measurements in MSP are equal to serum. When  
147 collecting in CS tubes 11-18% lower concentrations were observed for all steroids. The Guideline on  
148 Bioanalytical Method Validation (2011) of the European Medicines Agency advises that accuracy must  
149 be within 15 % of the nominal concentration and within 20 % at the LLOQ<sup>34</sup>. The decreases observed for  
150 most steroids in CS tubes using serum as a reference were within this acceptable range (**Table 2**).  
151 Therefore, we conclude that CS samples are suitable for steroid profiling, which can be combined with  
152 analysis of CTCs or ctDNA. However, caution is advised when interpreting results obtained in CS samples  
153 against reference values that were obtained in serum, and direct comparison to samples collected in  
154 other tubes should be avoided. Nevertheless, these findings may reduce patient burden and open up  
155 the possibility to add detailed steroid profiling of large collections of biomaterial already collected for  
156 ctDNA analysis.

157 In this study, most steroids could be quantified accurately within the range of the calibration series.  
158 Most of the  $\Delta$ 4-steroids, such as cortisol or testosterone, ionise more easily and so can be accurately  
159 quantified at low levels (0.03 – 0.15 nM). This allows for the quantification of testosterone in mCRPC  
160 patients (typically <0.5nM)<sup>11</sup>.  $\Delta$ 5-steroids such as DHEA and saturated steroids such as DHT are poor  
161 ionisers and quantification at lower concentrations is beyond the sensitivity of the mass spectrometer<sup>22</sup>.  
162 Like testosterone, DHT levels are suppressed in castrated patients and the concentrations in these  
163 patients could not be accurately assessed. DHEA levels in men decline with age<sup>35</sup>, and the mCRPC  
164 subjects in this study were older than the HC subjects. Consequently, values below the LLOQ were

165 detected in four CRPC patients and were excluded from the analysis. Derivatization, for example to form  
166 an oxime, increases ionizability, and therefore sensitivity allowing low level quantification of  $\Delta 5$ - and 5 $\alpha$ -  
167 reduced steroids<sup>22</sup>. However, the derivatization method is not suited for routine clinical diagnostic  
168 measurements due to increased sample preparation time and cost. In addition to this, fragmentation  
169 produces multiple derivatives for some steroids adding to the complexity of the analysis.

170 Matrix effects and cross-reactivity are established sources of interference in steroid hormone profile  
171 studies with immunoassay and LC-MS/MS<sup>24-29</sup>. Previous studies have identified the type of blood sample  
172 tube as a potential source of interference. MSP tubes like BD Vacutainer Barricor utilise mechanical  
173 separation which makes them easily applicable, but the accuracy of steroid hormone measurements in  
174 these tubes has not been validated. One study<sup>33</sup> showed no differences to gel-based plasma tubes, but  
175 these measurements were performed on a single platform with a limited number of steroids, namely  
176 cortisol, DHEAS, oestradiol, progesterone, and testosterone. Our study shows that multi-plex steroid  
177 quantification in MSP sample tubes is comparable to the reference serum tubes. We detected no  
178 significant differences, with the exception of DHEA. This seemed to be largely driven by samples in the  
179 HC group. Quantification of DHEA at low concentrations with LC-MS/MS remains a challenge as its  
180 structure contributes to poor MS ionization<sup>22,36</sup>. This challenge could be overcome by using a more  
181 sensitive mass spectrometer or with the use of derivatization. Prior to using MSP tubes for clinical  
182 studies however, full validation looking at accuracy, precision and recovery is recommended.

183 CS tubes are optimised for the measurement of circulating nucleic acids or tumour cells<sup>30,31</sup>. The use of  
184 this matrix for liquid biopsies has increased exponentially over the last years due to the successful  
185 genomic characterization of CTCs or free circulating nucleic acids, but no studies have investigated if CS  
186 tubes are suitable for quantification of circulating steroid hormone levels. Our experiments indicate that  
187 steroid measurements in CS tubes are affected by a mild bias which resulted in an approximate 10 – 20%

188 decrease compared to serum. We observed similar effects in both HCs and mCRPC subjects. CS tubes  
189 contain 300  $\mu$ l of Na<sub>2</sub>EDTA anticoagulant as well as an undisclosed preservative to stabilise cells in the  
190 sample. Due to the presence of the Na<sub>2</sub>EDTA there may be an inherent dilution of the sample, which  
191 amounts to approximately 3-4 % on a 7.5 – 10 ml volume. This dilution factor is insufficient to account  
192 for the difference in circulating steroid hormone levels however. Consequently, it is possible that other  
193 factors also contribute towards the observed difference.

194 This decrease was observed across a variety of different polarity steroids with different molecular  
195 weights. It is therefore unlikely that the preservative co-elutes with one of the steroids and suppresses  
196 the MS signal. Either there is an unidentified contaminant in the tubes which affects all steroids or the  
197 steroids themselves are being retained/bind to the tube itself. Steroids have been long recognised to  
198 stick to plastics<sup>37</sup>, which may contribute to the lower values in CS samples.

199 Currently, CS tubes are most commonly utilised in oncological studies to obtain CTCs and ctDNA.  
200 Hormonal treatment options in breast and prostate cancer involve potent suppression of oestrogens or  
201 androgens. For example, inhibition of testicular steroidogenesis by ADT will typically lower testosterone  
202 levels by >90 %<sup>11</sup>. Interpretation of such changes is unlikely to be affected by the difference observed in  
203 CS samples. Especially within the context of a single study the relative difference should affect all  
204 samples identically as long as a single collection tube is used. As such, the observed difference is  
205 acceptable for most clinical purposes, including the use of CS samples for steroid profiling in prostate  
206 cancer patients. Steroid profiles and analysis of CTCs or ctDNA investigation will decrease costs and  
207 reduce patient burden.

208 In conclusion, mechanically-separated plasma samples are suitable for steroid quantification, including  
209 castrate range of androgens. Similarly, CellSave samples are suitable for steroid measurements,  
210 although there is a consistent bias of –11-18% lower steroid hormone levels. Because of this, all samples

211 in a research study should be collected in the same sample tubes to avoid potential variation due to  
212 effects from the tubes themselves.

## 213 **MATERIALS AND METHODS**

### 214 *Subjects*

215 At the Erasmus MC Cancer Institute in Rotterdam, The Netherlands, healthy controls (HCs) and patients  
216 were included within study EMC-2016-761, which was approved by the medical ethical committee of  
217 our institute. HCs were all adult male subjects. Patients were adult subjects with metastatic castration-  
218 resistant prostate cancer (mCRPC), treated with ADT. Patients were eligible to start treatment with or  
219 were currently treated with second-line hormonal therapy (abiraterone with prednisone, enzalutamide  
220 or apalutamide). For all subjects the following exclusion criteria were applied: 1) endocrine disease with  
221 altered activity of the hypothalamic-pituitary-adrenal or hypothalamic-pituitary-gonadal axis; 2) the use  
222 of medications, excluding those used to treat prostate cancer, that interfered with circulating steroid  
223 levels or dysregulated the hypothalamic-pituitary-adrenal or hypothalamic-pituitary-gonadal axis. All  
224 subjects provided written informed consent before any study procedure.

### 225 *Samples*

226 Blood was collected from HCs and mCRPC patients in SST™ II Advance Vacutainer® (serum; BD, Franklin  
227 Lakes, NJ, USA), Barricor Vacutainer® (BD) and CellSave Preservative (Menarini Silicon Biosystems Inc,  
228 Huntington Valley, PA, USA) blood collection tubes. All samples were processed within 96 hours after  
229 blood collection. All tubes were centrifuged at 1,711g for 10 minutes at room temperature. Plasma from  
230 CellSave tubes was subsequently centrifuged at 12,000g for 10 minutes at 4°C. Samples were stored at -  
231 80°C until extraction.

232

233 *Steroid extraction*

234 Calibration series (0.25 ng/ml – 500 ng/ml for HC, and 0.01 ng/ml – 500 ng/ml for mCRPC) were  
235 prepared in phosphate buffered saline (PBS) with 0.1% bovine serum albumin (BSA) or in charcoal-  
236 stripped pooled human serum (Goldenwest Diagnostics, Temecula, CA, USA). Steroids investigated were  
237 17-hydroxyprogesterone, androstenedione, cortisol, cortisone, corticosterone, dehydroepiandrosterone  
238 (DHEA), dihydrotestosterone (DHT) and testosterone. The stripped-serum calibration series was used to  
239 quantify all steroids with the exception of androstenedione, due to a high background signal in stripped  
240 serum but not in PBS-BSA. An internal standard solution was prepared in methanol/water 50/50 with  
241 equal concentrations (1 µg/ml) of the following deuterated steroids: 17-hydroxyprogesterone-d8,  
242 cortisol-d4, corticosterone-d8, DHEA-d6, DHT-d3, testosterone-d3. All steroids were obtained from  
243 Sigma Aldrich, UK.

244 400 µl of sample was transferred to hexamethyldisilazane-treated (Thermo Fisher) glass tubes (VWR,  
245 Amsterdam, The Netherlands). 20 µl of the internal standard solution was added and all samples were  
246 thoroughly vortexed. Liquid-liquid extraction was performed by adding 2 ml methyl-tert butyl ether  
247 (MTBE, Sigma Aldrich, Zwijndrecht, The Netherlands) to each tube and vortexing. The samples were left  
248 at room temperature for 30 minutes to allow phase separation. The upper organic layer was transferred  
249 and the MTBE was evaporated under nitrogen at 50° C. The samples underwent a second liquid-liquid  
250 extraction with 2 ml MTBE. Samples were reconstituted in 125 µl LC-MS grade 50% methanol  
251 (CHROMASOLV, Sigma Aldrich, Zwijndrecht, The Netherlands) before measurement.

252

253 *LC-MS/MS*

254 Steroid concentrations were measured by mass spectrometry (Xevo TQ-XS, Waters, Milford, MA, USA)  
255 after separation on an ACQUITY uPLC (Waters) with a Waters HSS T3 column (2.1 mm x 50 mm, 1.8  $\mu$ m,  
256 Waters)<sup>38-43</sup>. The mobile phases consisted of water (A) and methanol (B) both with 0.1% formic acid and  
257 a 5-minute linear gradient was used (45 – 75% B) with a flow rate of 0.6 ml/min. The multiple reaction  
258 monitoring settings and validation of these LC-MS/MS methods were previously reported<sup>38,42</sup>. Steroids  
259 were quantified against the linear calibration series relative to an internal standard and were only  
260 included in the final analysis if the calibration series  $R^2$  was > 0.99 and appropriate lower limits of  
261 quantification were reached. The lower limit of accurate quantification (LLOQ) was set to the lowest  
262 calibration concentration that had a clearly defined peak and a signal-to-noise ratio > 10. Samples with  
263 concentrations below the LLOQ were detectable, but not accurately quantifiable.

264 *Statistics*

265 LC-MS/MS raw data was processed using MassLynx (v4.1, Waters). Statistical analysis was performed  
266 using GraphPad Prism (Version 5). Normality of data was analysed with D'Agostino & Pearson's test.  
267 Comparisons of steroid hormone concentrations across the blood collection tubes were performed with  
268 repeat measurements 1-way ANOVA with post-hoc Dunnett's test. Correlations in hormone levels were  
269 determined by linear regression. Group concentrations and differences are shown as mean  $\pm$  SD, unless  
270 specified otherwise. P values were considered significant if <0.05.

271 **Data Availability**

272 The datasets generated during and/or analysed during the current study are available from the  
273 corresponding author on reasonable request.

274 **References**

- 275 1 Sharifi, N., Gulley, J. L. & Dahut, W. L. Androgen deprivation therapy for prostate cancer. *JAMA*  
276 **294**, 238-244 (2005).
- 277 2 Linja, M. J. *et al.* Amplification and overexpression of androgen receptor gene in hormone-  
278 refractory prostate cancer. *Cancer Res* **61**, 3550-3555 (2001).
- 279 3 Taylor, B. S. *et al.* Integrative genomic profiling of human prostate cancer. *Cancer Cell* **18**, 11-22  
280 (2010).
- 281 4 Stanbrough, M. *et al.* Increased expression of genes converting adrenal androgens to  
282 testosterone in androgen-independent prostate cancer. *Cancer Res* **66**, 2815-2825 (2006).
- 283 5 Montgomery, R. B. *et al.* Maintenance of intratumoral androgens in metastatic prostate cancer:  
284 a mechanism for castration-resistant tumor growth. *Cancer Res* **68**, 4447-4454 (2008).
- 285 6 Mohler, J. L. *et al.* The androgen axis in recurrent prostate cancer. *Clin Cancer Res* **10**, 440-448  
286 (2004).
- 287 7 Scher, H. I. *et al.* Increased survival with enzalutamide in prostate cancer after chemotherapy. *N*  
288 *Engl J Med* **367**, 1187-1197 (2012).
- 289 8 de Bono, J. S. *et al.* Abiraterone and increased survival in metastatic prostate cancer. *N Engl J*  
290 *Med* **364**, 1995-2005 (2011).
- 291 9 Fizazi, K. *et al.* Abiraterone plus Prednisone in Metastatic, Castration-Sensitive Prostate Cancer.  
292 *N Engl J Med* **377**, 352-360 (2017).
- 293 10 Davis, I. D. *et al.* Enzalutamide with Standard First-Line Therapy in Metastatic Prostate Cancer. *N*  
294 *Engl J Med* **381**, 121-131 (2019).
- 295 11 Snaterse, G., Visser, J. A., Arlt, W. & Hofland, J. Circulating steroid hormone variations  
296 throughout different stages of prostate cancer. *Endocr Relat Cancer* **24**, R403-R420 (2017).

- 297 12 Sakamoto, S. *et al.* Higher Serum Testosterone Levels Associated with Favorable Prognosis in  
298 Enzalutamide- and Abiraterone-Treated Castration-Resistant Prostate Cancer. *J Clin Med* **8**  
299 (2019).
- 300 13 Attard, G. *et al.* Selective inhibition of CYP17 with abiraterone acetate is highly active in the  
301 treatment of castration-resistant prostate cancer. *J Clin Oncol* **27**, 3742-3748 (2009).
- 302 14 Wang, C., Catlin, D. H., Demers, L. M., Starcevic, B. & Swerdloff, R. S. Measurement of total  
303 serum testosterone in adult men: comparison of current laboratory methods versus liquid  
304 chromatography-tandem mass spectrometry. *J Clin Endocrinol Metab* **89**, 534-543 (2004).
- 305 15 Taieb, J. *et al.* Testosterone measured by 10 immunoassays and by isotope-dilution gas  
306 chromatography-mass spectrometry in sera from 116 men, women, and children. *Clin Chem* **49**,  
307 1381-1395 (2003).
- 308 16 Handelsman, D. J. *et al.* Performance of direct estradiol immunoassays with human male serum  
309 samples. *Clin Chem* **60**, 510-517 (2014).
- 310 17 Krasowski, M. D. *et al.* Cross-reactivity of steroid hormone immunoassays: clinical significance  
311 and two-dimensional molecular similarity prediction. *BMC Clin Pathol* **14**, 33 (2014).
- 312 18 Taylor, A. E., Keevil, B. & Huhtaniemi, I. T. Mass spectrometry and immunoassay: how to  
313 measure steroid hormones today and tomorrow. *Eur J Endocrinol* **173**, D1-12 (2015).
- 314 19 Monaghan, P. J., Keevil, B. G. & Trainer, P. J. The use of mass spectrometry to improve the  
315 diagnosis and the management of the HPA axis. *Rev Endocr Metab Disord* **14**, 143-157 (2013).
- 316 20 Arlt, W. *et al.* Steroid metabolome analysis reveals prevalent glucocorticoid excess in primary  
317 aldosteronism. *JCI Insight* **2** (2017).
- 318 21 Arlt, W. *et al.* Urine steroid metabolomics as a biomarker tool for detecting malignancy in  
319 adrenal tumors. *J Clin Endocrinol Metab* **96**, 3775-3784 (2011).



- 320 22 Hakkinen, M. R. *et al.* Simultaneous analysis by LC-MS/MS of 22 ketosteroids with  
321 hydroxylamine derivatization and underivatized estradiol from human plasma, serum and  
322 prostate tissue. *J Pharm Biomed Anal* **164**, 642-652 (2019).
- 323 23 Storbeck, K. H. *et al.* Steroid metabolome analysis in disorders of adrenal steroid biosynthesis  
324 and metabolism. *Endocr Rev* (2019).
- 325 24 Coburn, S. B. *et al.* Comparability of serum, plasma, and urinary estrogen and estrogen  
326 metabolite measurements by sex and menopausal status. *Cancer Causes Control* **30**, 75-86  
327 (2019).
- 328 25 Hepburn, S. *et al.* Sex steroid hormone stability in serum tubes with and without separator gels.  
329 *Clin Chem Lab Med* **54**, 1451-1459 (2016).
- 330 26 Raff, H. & Sluss, P. M. Pre-analytical issues for testosterone and estradiol assays. *Steroids* **73**,  
331 1297-1304 (2008).
- 332 27 Morovat, A. *et al.* Comparison of Bayer Advia Centaur immunoassay results obtained on samples  
333 collected in four different Becton Dickinson Vacutainer tubes. *Ann Clin Biochem* **43**, 481-487  
334 (2006).
- 335 28 Smets, E. M., Dijkstra-Lagemaat, J. E. & Blankenstein, M. A. Influence of blood collection in  
336 plastic vs. glass evacuated serum-separator tubes on hormone and tumour marker levels. *Clin*  
337 *Chem Lab Med* **42**, 435-439 (2004).
- 338 29 Schouwers, S. *et al.* Influence of separator gel in Sarstedt S-Monovette(R) serum tubes on  
339 various therapeutic drugs, hormones, and proteins. *Clin Chim Acta* **413**, 100-104 (2012).
- 340 30 Rothwell, D. G. *et al.* Genetic profiling of tumours using both circulating free DNA and circulating  
341 tumour cells isolated from the same preserved whole blood sample. *Mol Oncol* **10**, 566-574  
342 (2016).

- 343 31 van Dessel, L. F. *et al.* Application of circulating tumor DNA in prospective clinical oncology trials  
344 - standardization of preanalytical conditions. *Mol Oncol* **11**, 295-304 (2017).
- 345 32 van Dessel, L. F. *et al.* The genomic landscape of metastatic castration-resistant prostate cancers  
346 reveals multiple distinct genotypes with potential clinical impact. *Nat Commun* **10**, 5251 (2019).
- 347 33 Fournier, J. E. *et al.* Evaluation of BD Vacutainer(R) Barricor blood collection tubes for routine  
348 chemistry testing on a Roche Cobas(R) 8000 Platform. *Clin Biochem* **58**, 94-99 (2018).
- 349 34 European Medicines Agency. Guideline on Bioanalytical Method Validation. (2011).
- 350 35 Kaufman, J. M. & Vermeulen, A. The decline of androgen levels in elderly men and its clinical and  
351 therapeutic implications. *Endocr Rev* **26**, 833-876 (2005).
- 352 36 Keski-Rahkonen, P., Huhtinen, K., Poutanen, M. & Auriola, S. Fast and sensitive liquid  
353 chromatography-mass spectrometry assay for seven androgenic and progestagenic steroids in  
354 human serum. *J Steroid Biochem Mol Biol* **127**, 396-404 (2011).
- 355 37 Bruning, P. F., Jonker, K. M. & Boerema-Baan, A. W. Adsorption of steroid hormones by plastic  
356 tubing. *J Steroid Biochem* **14**, 553-555 (1981).
- 357 38 O'Reilly, M. W. *et al.* A unique androgen excess signature in idiopathic intracranial hypertension  
358 is linked to cerebrospinal fluid dynamics. *JCI Insight* **4** (2019).
- 359 39 Buttler, R. M. *et al.* Comparison of 7 Published LC-MS/MS Methods for the Simultaneous  
360 Measurement of Testosterone, Androstenedione, and Dehydroepiandrosterone in Serum. *Clin*  
361 *Chem* **61**, 1475-1483 (2015).
- 362 40 van der Pas, R. *et al.* Fluconazole inhibits human adrenocortical steroidogenesis in vitro. *J*  
363 *Endocrinol* **215**, 403-412 (2012).
- 364 41 Hassan-Smith, Z. K. *et al.* Gender-Specific Differences in Skeletal Muscle 11beta-HSD1 Expression  
365 Across Healthy Aging. *J Clin Endocrinol Metab* **100**, 2673-2681 (2015).

366 42 Quanson, J. L. *et al.* High-throughput analysis of 19 endogenous androgenic steroids by ultra-  
367 performance convergence chromatography tandem mass spectrometry. *J Chromatogr B Analyt*  
368 *Technol Biomed Life Sci* **1031**, 131-138 (2016).

369 43 O'Reilly, M. W. *et al.* 11-Oxygenated C19 Steroids Are the Predominant Androgens in Polycystic  
370 Ovary Syndrome. *J Clin Endocrinol Metab* **102**, 840-848 (2017).

371

372

373 **Acknowledgements**

374 Funding for this project was provided by the Daniel den Hoed foundation.

375 The authors thank the volunteers and patients who made this study possible.

376 **Author Information**

377 These authors contributed equally: Gido Snaterse and Lisanne F van Dessel.

378 **Author Contributions**

379 G.S. performed the LC-MS/MS experiments, data analysis, prepared figures/tables and wrote the  
380 manuscript. L.F.D. collected the patient samples, performed data analysis, prepared figures/tables and  
381 wrote the manuscript. A.E.T. oversaw the LC-MS/MS experiments and analysis of the data, and critical  
382 revision of the manuscript. W.A. was involved in interpretation of the data and critical revision of the  
383 manuscript. M.P.L. was involved in the design of the work, collection of the samples and critical revision  
384 of the manuscript. J.A.V and J.H. were involved in the design of the work, interpretation of the data,  
385 critical revision of the manuscript.

386 All authors reviewed and approved the final version of the manuscript.

387 **Corresponding author**

388 Correspondence to Johannes Hofland.

389 **Conflict of Interest**

390 M. P. L. is the recipient of grants of Sanofi, Johnson & Johnson and Astellas. Other authors did not  
391 declare a conflict of interests.

392

393 **Table 1 – Characteristics of healthy controls and castration-resistant prostate cancer patients**

394 Abbreviations: mCRPC – metastatic castration-resistant prostate cancer

|                                          | <b>Healthy Controls</b> | <b>mCRPC patients</b> |
|------------------------------------------|-------------------------|-----------------------|
| <b>N</b>                                 | 10                      | 10                    |
| <b>Age (median (range))</b>              | 32 (25 - 56)            | 64 (59 - 76)          |
| <b>Androgen Deprivation Therapy (n)</b>  |                         | <b>10</b>             |
| Leuproreline                             |                         | 4                     |
| Gosereline                               |                         | 4                     |
| Bilateral orchiectomy                    |                         | 2                     |
| <b>Current second-line treatment (n)</b> |                         | <b>6</b>              |
| Enzalutamide                             |                         | 3                     |
| Apalutamide                              |                         | 1                     |
| Abiraterone + Prednisone                 |                         | 1                     |
| Prednisone                               |                         | 1                     |

395

396 **Table 2 – Relative differences in CS and MSP tubes compared to SST™ II Advance Vacutainers.**

397 Relative differences are shown as mean ± SD. Statistical analysis was performed by repeated  
398 measurement 1-way ANOVA with post-hoc Dunnett’s Test. \*p<0.05, \*\* p<0.01, \*\*\*p<0.001.

399 Abbreviations: CS – CellSave Preservative, DHEA – dehydroepiandrosterone, DHT – dihydrotestosterone,  
400 HC – Healthy Control, mCRPC – metastatic castration-resistant prostate cancer, MSP – mechanically  
401 seperated plasma tube

|                        | Healthy Controls<br>(n = 10) |                                      |                                          | mCRPC<br>(n = 10)        |                                      |                                       |
|------------------------|------------------------------|--------------------------------------|------------------------------------------|--------------------------|--------------------------------------|---------------------------------------|
|                        | Serum<br>Range<br>nmol/L     | CS<br>Rel. Difference<br>mean (SD) % | MSP<br>Rel.<br>Difference<br>mean (SD) % | Serum<br>Range<br>nmol/L | CS<br>Rel. Difference<br>mean (SD) % | MSP<br>Rel. Difference<br>mean (SD) % |
| Corticosterone         | 2.32 - 32.71                 | -20.08 (16.6) **                     | 2.6 (11)                                 | 0.55 - 25.34             | -12.3 (13.3) *                       | -2.8 (9.8)                            |
| 17-hydroxyprogesterone | 0.37 - 3.75                  | -14.4 (15.3) *                       | 3.16 (16.26)                             | 0.05 - 1.75              | -7.6 (24.22)                         | -2.3 (16.58)                          |
| Cortisol               | 149.1 - 475.7                | -13.7 (6.1) ***                      | -0.14 (3.5)                              | 7.43 - 504.6             | -12.7 (17.9) **                      | -1.3 (16.1)                           |
| Cortisone              | 36.35 - 79.4                 | -10.8 (6.3) ***                      | -2 (9.2)                                 | 0.1 - 80.81              | -17.9 (17.2) **                      | -1.5 (10.5)                           |
| DHEA                   | 0.69 - 36.14                 | -0.17 (18.8)                         | 28.7 (46.6)*                             | <LOQ - 1.7               | -17.7 (16.5)                         | 6.0 (12.2)                            |
| Androstenedione        | 2.33 - 6.05                  | -15.85 (13.5) **                     | 6.9 (9.5)                                | 0.48 - 3.19              | -21.2 (14.01)<br>**                  | 6.34 (10.4)                           |
| Testosterone           | 7.47 - 17.74                 | -11.48 (2.8) ***                     | 0.82 (4.7)                               | 0.06 - 0.78              | -19.6 (28.2) *                       | -3.5 (33.3)                           |
| DHT                    | 0.66 - 1.64                  | -11.26 (29.2)                        | -3.5 (30.4)                              | <LOQ                     | <LOQ                                 | <LOQ                                  |

402

403

404 **Figure 1. CS and MSP samples compared to serum in healthy controls and mCRPC patients.**

405 Steroid concentrations from serum, CS and MSP samples obtained from ten healthy controls and ten  
406 mCRPC patients measured by LC-MS/MS. Relative difference of CS and MSP measurements compared to  
407 serum is shown. \* $p < 0.05$ , \*\* $p < 0.01$ , \*\*\* $p < 0.001$ , compared to serum matrix. Repeated Measurements  
408 1-way ANOVA with post-hoc Dunnett's Test.

409 Abbreviations: CS – CellSave Preservative, DHEA – dehydroepiandrosterone, HC – Healthy Control,  
410 mCRPC – metastatic castration-resistant prostate cancer, MSP – mechanically seperated plasma tube



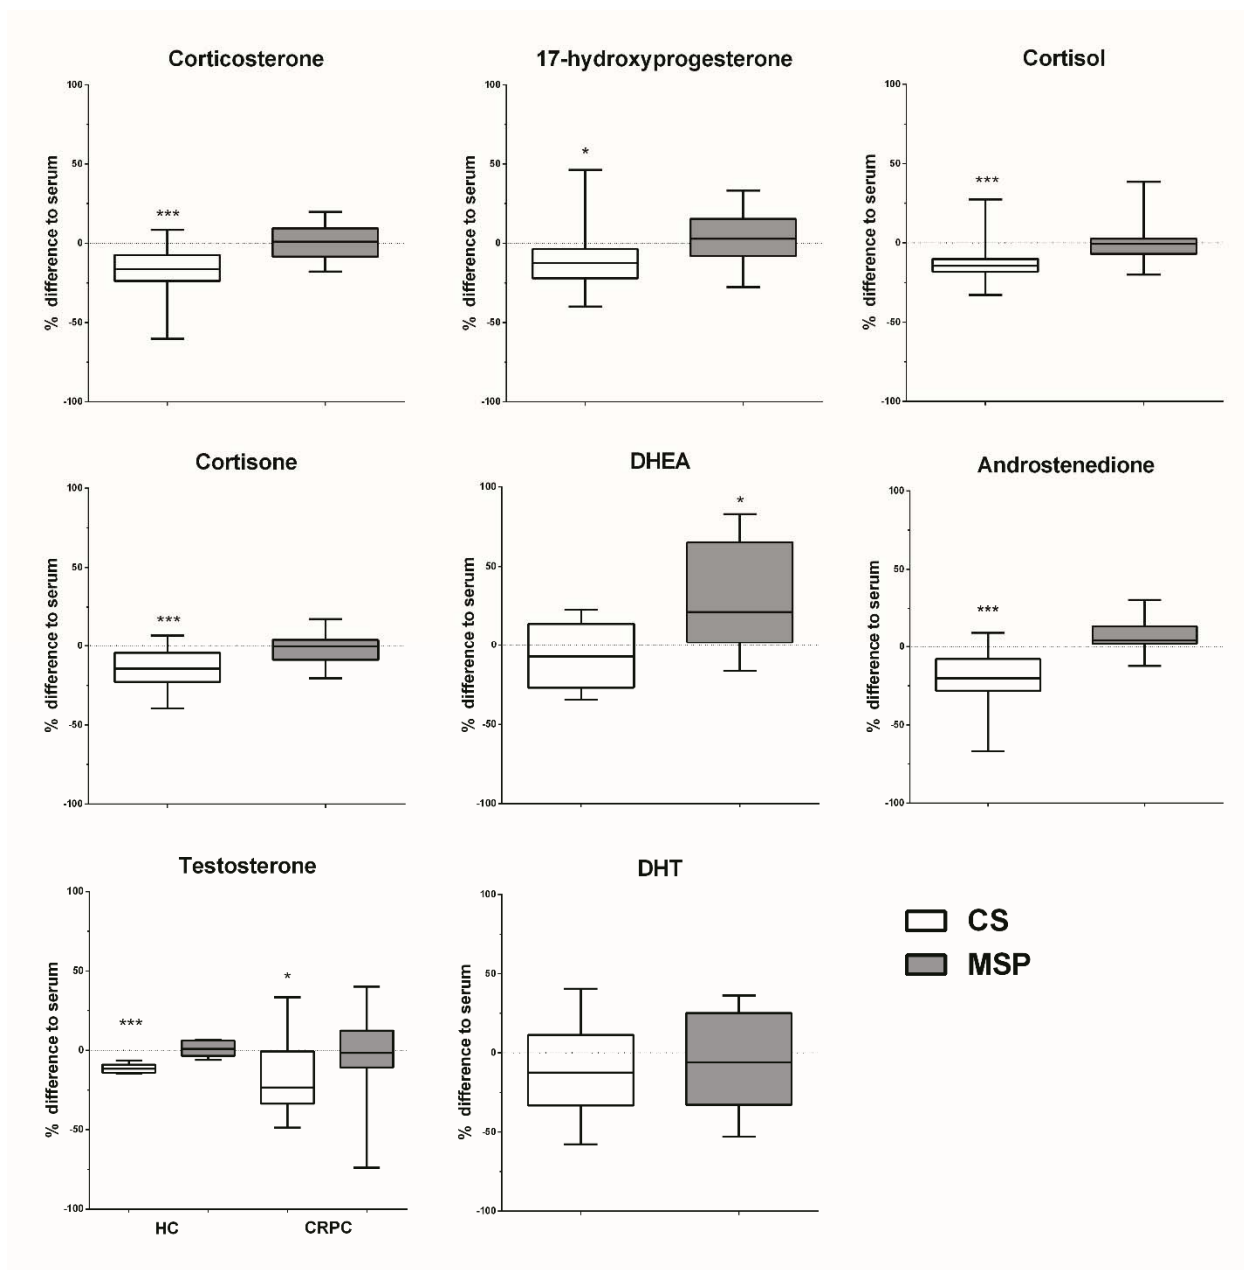

411

412

413 **Figure 2 – Circulating steroid concentrations in healthy controls and mCRPC subject serum.**

414 Steroid hormone concentrations in healthy controls (n = 10) and mCRPC patients (n = 10). Four patients  
415 received no additional treatment, four received antiandrogens (enzalutamide (n=3) or apalutamide  
416 (n=1)), one received abiraterone and prednisone and one received prednisone. Line and error represent  
417 mean  $\pm$  SEMs.

418 *Abbreviations:* 17OHP – 17-hydroxyprogesterone, A4 – androstenedione, B – corticosterone, DHEA –  
419 dehydroepiandrosterone, CRPC – castration-resistant prostate cancer, E – cortisone, F – cortisol, T –  
420 testosterone

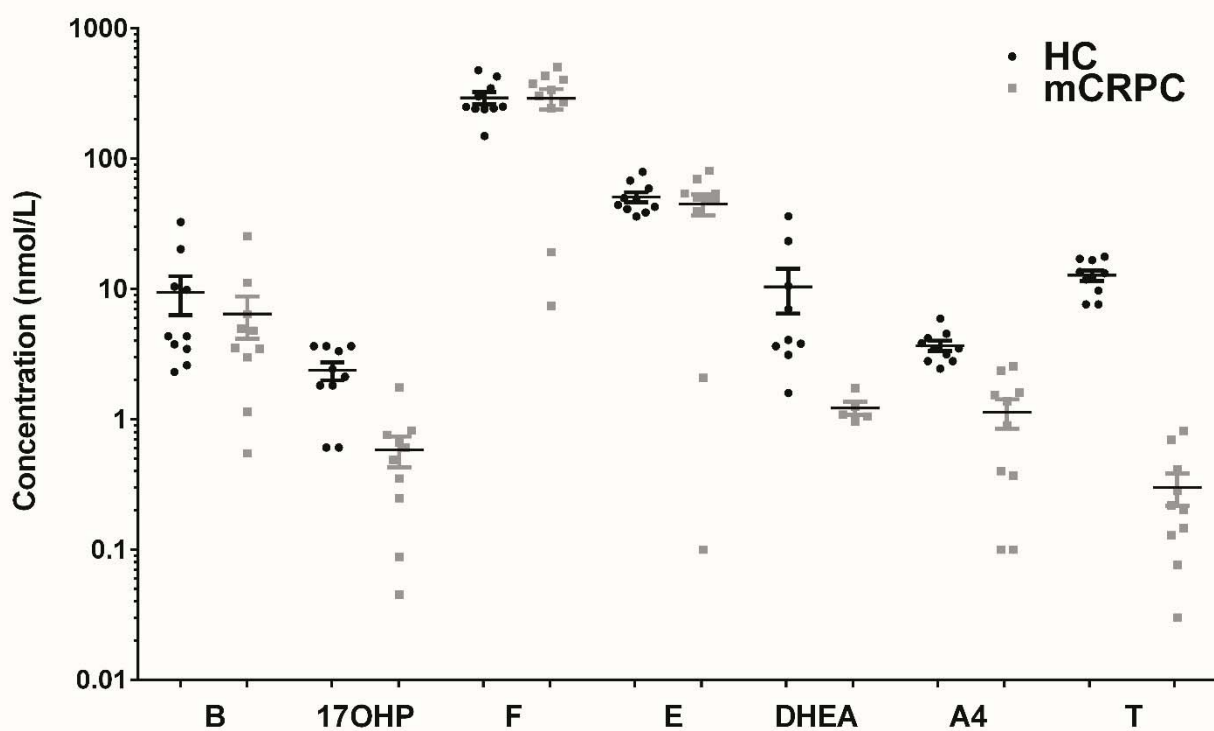

421

422 **Figure 3 – Correlations between CS samples and MSP samples with serum.**

423 Linear regression analysis between serum and CellSave measurements and between serum and MSP  
424 measurements in healthy controls and mCRPC patients combined. Corticosterone, DHEA and  
425 testosterone values did not pass normality testing (D’Agostino and Pearson), but did so after logarithmic  
426 transformation. *Abbreviations:* CS – CellSave Preservative Tube, DHEA – dehydroepiandrosterone, MSP –  
427 mechanically separated plasma tube.

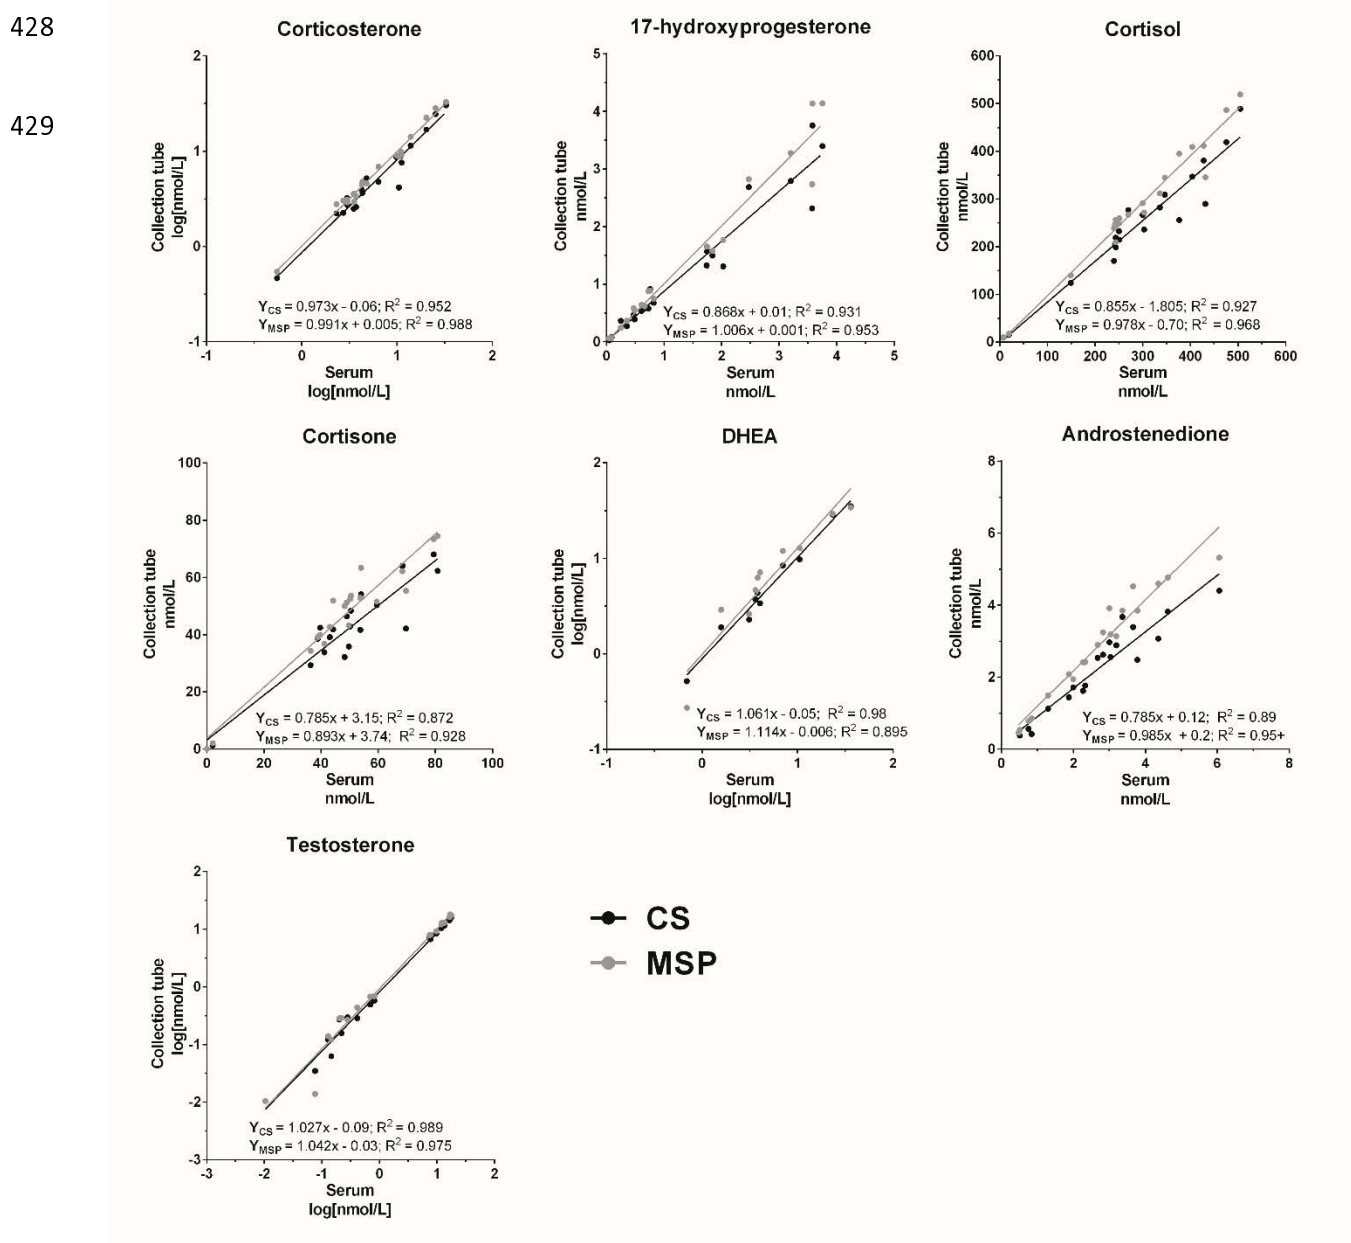

Source: https://www.medrxiv.org/content/10.1101/2020.08.05.20164202v1.full.pdf
